# Supplementary material for: Epidemic spread of smut fungi (Quambalaria) by sexual reproduction in a native pathosystem
Source: Springer Nature journal article supplement (doi:10.1007/s10658-022-02480-3), 2022-02-19
Supplement: MOESM1 [file 10658_2022_2480_MOESM1_ESM.docx]

Supplementary table 1: Sample source location, host, host provenance and host tissue type of all isolates used in the study.

| **Isolate number** | **Population** | **Host species** | **Provenance** | **Plant part sampled** |
| --- | --- | --- | --- | --- |
| Q363 | Traveston | *Corymbia variegata* | Richmond Range | leaf/shoot |
| Q365 | Traveston | *Corymbia variegata* | Richmond Range | leaf/shoot |
| Q366 | Traveston | *Corymbia variegata* | Richmond Range | leaf/shoot |
| Q368 | Traveston | *Corymbia variegata* | Richmond Range | leaf/shoot |
| Q369 | Traveston | *Corymbia variegata* | Richmond Range | leaf/shoot |
| Q370 | Traveston | *Corymbia variegata* | Richmond Range | leaf/shoot |
| Q373a | Traveston | *Corymbia variegata* | Richmond Range | leaf/shoot |
| Q373b | Traveston | *Corymbia variegata* | Richmond Range | leaf/shoot |
| Q373c | Traveston | *Corymbia variegata* | Richmond Range | leaf/shoot |
| Q373d | Traveston | *Corymbia variegata* | Richmond Range | leaf/shoot |
| Q373e | Traveston | *Corymbia variegata* | Richmond Range | leaf/shoot |
| Q373f | Traveston | *Corymbia variegata* | Richmond Range | leaf/shoot |
| Q374a | Traveston | *Corymbia variegata* | Richmond Range | leaf/shoot |
| Q374b | Traveston | *Corymbia variegata* | Richmond Range | leaf/shoot |
| Q374c | Traveston | *Corymbia variegata* | Richmond Range | leaf/shoot |
| Q375 | Traveston | *Corymbia variegata* | Richmond Range | leaf/shoot |
| Q377 | Traveston | *Corymbia variegata* | Richmond Range | leaf/shoot |
| Q379a | Traveston | *Corymbia variegata* | Richmond Range | leaf/shoot |
| Q379b | Traveston | *Corymbia variegata* | Richmond Range | leaf/shoot |
| Q379c | Traveston | *Corymbia variegata* | Richmond Range | leaf/shoot |
| Q379d | Traveston | *Corymbia variegata* | Richmond Range | leaf/shoot |
| Q382a | Traveston | *Corymbia variegata* | Richmond Range | leaf/shoot |
| Q382b | Traveston | *Corymbia variegata* | Richmond Range | leaf/shoot |
| Q382c | Traveston | *Corymbia variegata* | Richmond Range | leaf/shoot |
| Q382d | Traveston | *Corymbia variegata* | Richmond Range | leaf/shoot |
| Q383 | Traveston | *Corymbia variegata* | Richmond Range | leaf/shoot |
| Q386 | Traveston | *Corymbia variegata* | Richmond Range | leaf/shoot |
| Q390 | Traveston | *Corymbia variegata* | Richmond Range | leaf/shoot |
| Q391 | Traveston | *Corymbia variegata* | Richmond Range | leaf/shoot |
| Q393 | Traveston | *Corymbia variegata* | Richmond Range | leaf/shoot |
| Q394 | Traveston | *Corymbia variegata* | Richmond Range | leaf/shoot |
| Q404 | Traveston | *Corymbia variegata* | Richmond Range | leaf/shoot |
| Q406 | Traveston | *Corymbia variegata* | Richmond Range | leaf/shoot |
| Q409 | Traveston | *Corymbia variegata* | Richmond Range | leaf/shoot |
| Q414 | Traveston | *Corymbia variegata* | Richmond Range | leaf/shoot |
| Q418 | Traveston | *Corymbia variegata* | Richmond Range | leaf/shoot |
| Q420a | Traveston | *Corymbia variegata* | Richmond Range | leaf/shoot |
| Q420b | Traveston | *Corymbia variegata* | Richmond Range | leaf/shoot |
| Q424 | Traveston | *Corymbia variegata* | Richmond Range | leaf/shoot |
| Q426a | Traveston | *Corymbia variegata* | Richmond Range | leaf/shoot |
| Q426b | Traveston | *Corymbia variegata* | Richmond Range | leaf/shoot |
| Q426c | Traveston | *Corymbia variegata* | Richmond Range | leaf/shoot |
| Q430 | Traveston | *Corymbia variegata* | Richmond Range | leaf/shoot |
| Q432 | Traveston | *Corymbia variegata* | Richmond Range | leaf/shoot |
| Q433 | Traveston | *Corymbia variegata* | Richmond Range | leaf/shoot |
| Q435 | Traveston | *Corymbia variegata* | Richmond Range | leaf/shoot |
| Q435a | Traveston | *Corymbia variegata* | Richmond Range | leaf/shoot |
| Q435b | Traveston | *Corymbia variegata* | Richmond Range | leaf/shoot |
| Q435c | Traveston | *Corymbia variegata* | Richmond Range | leaf/shoot |
| Q435d | Traveston | *Corymbia variegata* | Richmond Range | leaf/shoot |
| Q435e | Traveston | *Corymbia variegata* | Richmond Range | leaf/shoot |
| Q439 | Traveston | *Corymbia variegata* | Richmond Range | leaf/shoot |
| Q445 | Traveston | *Corymbia variegata* | Richmond Range | leaf/shoot |
| Q447 | Traveston | *Corymbia variegata* | Richmond Range | leaf/shoot |
| Q453 | Traveston | *Corymbia variegata* | Richmond Range | leaf/shoot |
| Q455 | Traveston | *Corymbia variegata* | Richmond Range | leaf/shoot |
| Q458a | Traveston | *Corymbia variegata* | Richmond Range | leaf/shoot |
| Q458b | Traveston | *Corymbia variegata* | Richmond Range | leaf/shoot |
| Q458c | Traveston | *Corymbia variegata* | Richmond Range | leaf/shoot |
| Q459 | Traveston | *Corymbia variegata* | Richmond Range | leaf/shoot |
| Q461 | Traveston | *Corymbia variegata* | Richmond Range | leaf/shoot |
| Q463A | Traveston | *Corymbia variegata* | Richmond Range | leaf/shoot |
| Q463B | Traveston | *Corymbia variegata* | Richmond Range | leaf/shoot |
| Q463C | Traveston | *Corymbia variegata* | Richmond Range | leaf/shoot |
| Q463D | Traveston | *Corymbia variegata* | Richmond Range | leaf/shoot |
| Q464A | Traveston | *Corymbia variegata* | Richmond Range | leaf/shoot |
| Q467A | Traveston | *Corymbia variegata* | Richmond Range | leaf/shoot |
| Q467B | Traveston | *Corymbia variegata* | Richmond Range | leaf/shoot |
| Q467Ba | Traveston | *Corymbia variegata* | Richmond Range | leaf/shoot |
| Q467Bb | Traveston | *Corymbia variegata* | Richmond Range | leaf/shoot |
| Q467Ca | Traveston | *Corymbia variegata* | Richmond Range | leaf/shoot |
| Q467Cb | Traveston | *Corymbia variegata* | Richmond Range | leaf/shoot |
| Q467Da | Traveston | *Corymbia variegata* | Richmond Range | leaf/shoot |
| Q467Db | Traveston | *Corymbia variegata* | Richmond Range | leaf/shoot |
| Q467Dc | Traveston | *Corymbia variegata* | Richmond Range | leaf/shoot |
| Q467Dd | Traveston | *Corymbia variegata* | Richmond Range | leaf/shoot |
| Q467De | Traveston | *Corymbia variegata* | Richmond Range | leaf/shoot |
| Q467Df | Traveston | *Corymbia variegata* | Richmond Range | leaf/shoot |
| Q467Dg | Traveston | *Corymbia variegata* | Richmond Range | leaf/shoot |
| Q467Dh | Traveston | *Corymbia variegata* | Richmond Range | leaf/shoot |
| Q468A | Traveston | *Corymbia variegata* | Richmond Range | leaf/shoot |
| Q468B | Traveston | *Corymbia variegata* | Richmond Range | leaf/shoot |
| Q468C | Traveston | *Corymbia variegata* | Richmond Range | leaf/shoot |
| Q468D | Traveston | *Corymbia variegata* | Richmond Range | leaf/shoot |
| Q190 | Grafton | *Corymbia variegata* | Clone 1 | leaf/shoot |
| Q191 | Grafton | *Corymbia variegata* | Clone 2 | leaf/shoot |
| Q192a | Grafton | *Corymbia variegata* | Clone 3 | leaf/shoot |
| Q192b | Grafton | *Corymbia variegata* | Clone 4 | leaf/shoot |
| Q193 | Grafton | *Corymbia variegata* | Clone 5 | leaf/shoot |
| Q194 | Grafton | *Corymbia variegata* | Clone 6 | leaf/shoot |
| Q195 | Grafton | *Corymbia variegata* | Clone 7 | leaf/shoot |
| Q196 | Grafton | *Corymbia variegata* | Clone 8 | leaf/shoot |
| Q198 | Grafton | *Corymbia variegata* | Clone 9 | leaf/shoot |
| Q199 | Grafton | *Corymbia variegata* | Clone 10 | leaf/shoot |
| Q200a | Grafton | *Corymbia variegata* | Clone 11 | leaf/shoot |
| Q200b | Grafton | *Corymbia variegata* | Clone 12 | leaf/shoot |
| Q201 | Grafton | *Corymbia variegata* | Clone 13 | leaf/shoot |
| Q202 | Grafton | *Corymbia variegata* | Clone 14 | leaf/shoot |
| Q202 | Grafton | *Corymbia variegata* | Clone 15 | leaf/shoot |
| Q204 | Grafton | *Corymbia variegata* | Clone 16 | leaf/shoot |
| Q205 | Grafton | *Corymbia variegata* | Clone 17 | leaf/shoot |
| Q319 | Grafton | *Corymbia citriodora* | Street Tree | leaf/shoot |
| Q320a | Grafton | *Corymbia citriodora* | Street Tree | Stem |
| Q320b | Grafton | *Corymbia citriodora* | Street Tree | Stem |
| Q321 | Grafton | *Corymbia citriodora* | Street Tree | Stem |
| Q322 | Grafton | *Corymbia citriodora* | Street Tree | Stem |
| Q337 | Grafton | *Corymbia citriodora* | Street Tree | leaf/shoot |
| Q342 | Grafton | *Corymbia citriodora* | Street Tree | leaf/shoot |
| Q343 | Grafton | *Corymbia maculata* | Street Tree | leaf/shoot |
| Q344 | Grafton | *Corymbia maculata* | Street Tree | leaf/shoot |
| Q345 | Grafton | *Corymbia maculata* | Street Tree | leaf/shoot |
| Q346 | Grafton | *Corymbia maculata* | Street Tree | leaf/shoot |
| Q150a | Beaudesert | *Corymbia variegata* | Richmond Range | leaf/shoot |
| Q150b | Beaudesert | *Corymbia variegata* | Richmond Range | leaf/shoot |
| Q151 | Beaudesert | *Corymbia variegata* | Richmond Range | leaf/shoot |
| Q152 | Beaudesert | *Corymbia variegata* | Richmond Range | leaf/shoot |
| Q153 | Beaudesert | *Corymbia variegata* | Richmond Range | leaf/shoot |
| Q154 | Beaudesert | *Corymbia variegata* | Richmond Range | leaf/shoot |
| Q206 | Beaudesert | *Corymbia variegata* | Richmond Range | leaf/shoot |
| Q207 | Beaudesert | *Corymbia variegata* | Richmond Range | leaf/shoot |
| Q209a | Beaudesert | *Corymbia variegata* | Richmond Range | leaf/shoot |
| Q209b | Beaudesert | *Corymbia variegata* | Richmond Range | leaf/shoot |
| Q210 | Beaudesert | *Corymbia variegata* | Richmond Range | leaf/shoot |
| Q211a | Beaudesert | *Corymbia variegata* | Richmond Range | leaf/shoot |
| Q211b | Beaudesert | *Corymbia variegata* | Richmond Range | leaf/shoot |
| Q211c | Beaudesert | *Corymbia variegata* | Richmond Range | leaf/shoot |
| Q214a | Beaudesert | *Corymbia variegata* | Richmond Range | leaf/shoot |
| Q214b | Beaudesert | *Corymbia variegata* | Richmond Range | leaf/shoot |
| Q216a | Beaudesert | *Corymbia variegata* | Richmond Range | leaf/shoot |
| Q216b | Beaudesert | *Corymbia variegata* | Richmond Range | leaf/shoot |
| Q218 | Beaudesert | *Corymbia variegata* | Richmond Range | leaf/shoot |
| Q219a | Beaudesert | *Corymbia variegata* | Richmond Range | leaf/shoot |
| Q219b | Beaudesert | *Corymbia variegata* | Richmond Range | leaf/shoot |
| Q221 | Beaudesert | *Corymbia variegata* | Richmond Range | leaf/shoot |
| Q224 | Beaudesert | *Corymbia variegata* | Richmond Range | leaf/shoot |
| Q225 | Beaudesert | *Corymbia variegata* | Richmond Range | leaf/shoot |
| Q226a | Beaudesert | *Corymbia variegata* | Richmond Range | leaf/shoot |
| Q226b | Beaudesert | *Corymbia variegata* | Richmond Range | leaf/shoot |
| Q226c | Beaudesert | *Corymbia variegata* | Richmond Range | leaf/shoot |
| Q228 | Beaudesert | *Corymbia variegata* | Richmond Range | leaf/shoot |
| Q231 | Beaudesert | *Corymbia variegata* | Richmond Range | leaf/shoot |
| Q236a | Beaudesert | *Corymbia variegata* | Richmond Range | leaf/shoot |
| Q236b | Beaudesert | *Corymbia variegata* | Richmond Range | leaf/shoot |
| Q237a | Beaudesert | *Corymbia variegata* | Richmond Range | leaf/shoot |
| Q237b | Beaudesert | *Corymbia variegata* | Richmond Range | leaf/shoot |
| Q237c | Beaudesert | *Corymbia variegata* | Richmond Range | leaf/shoot |
| Q237d | Beaudesert | *Corymbia variegata* | Richmond Range | leaf/shoot |
| Q237e | Beaudesert | *Corymbia variegata* | Richmond Range | leaf/shoot |
| Q237f | Beaudesert | *Corymbia variegata* | Richmond Range | leaf/shoot |
| Q238a | Beaudesert | *Corymbia variegata* | Richmond Range | leaf/shoot |
| Q238b | Beaudesert | *Corymbia variegata* | Richmond Range | leaf/shoot |
| Q238c | Beaudesert | *Corymbia variegata* | Richmond Range | leaf/shoot |
| Q238d | Beaudesert | *Corymbia variegata* | Richmond Range | leaf/shoot |
| Q239a | Beaudesert | *Corymbia variegata* | Richmond Range | leaf/shoot |
| Q239b | Beaudesert | *Corymbia variegata* | Richmond Range | leaf/shoot |
| Q239c | Beaudesert | *Corymbia variegata* | Richmond Range | leaf/shoot |
| Q239d | Beaudesert | *Corymbia variegata* | Richmond Range | leaf/shoot |
| Q239e | Beaudesert | *Corymbia variegata* | Richmond Range | leaf/shoot |
| Q244 | Beaudesert | *Corymbia variegata* | Richmond Range | leaf/shoot |
| Q249a | Beaudesert | *Corymbia variegata* | Richmond Range | leaf/shoot |
| Q249b | Beaudesert | *Corymbia variegata* | Richmond Range | leaf/shoot |
| Q249c | Beaudesert | *Corymbia variegata* | Richmond Range | leaf/shoot |
| Q251 | Beaudesert | *Corymbia variegata* | Richmond Range | leaf/shoot |
| Q253a | Beaudesert | *Corymbia variegata* | Richmond Range | leaf/shoot |
| Q253b | Beaudesert | *Corymbia variegata* | Richmond Range | leaf/shoot |
| Q253c | Beaudesert | *Corymbia variegata* | Richmond Range | leaf/shoot |
| Q254 | Beaudesert | *Corymbia variegata* | Richmond Range | leaf/shoot |
| Q299 | Beaudesert | *Corymbia variegata* | Richmond Range | leaf/shoot |
| Q302a | Beaudesert | *Corymbia variegata* | Richmond Range | leaf/shoot |
| Q302b | Beaudesert | *Corymbia variegata* | Richmond Range | leaf/shoot |
| Q303A | Beaudesert | *Corymbia variegata* | Richmond Range | leaf/shoot |
| Q303a | Beaudesert | *Corymbia variegata* | Richmond Range | leaf/shoot |
| Q303b | Beaudesert | *Corymbia variegata* | Richmond Range | leaf/shoot |
| Q304a | Beaudesert | *Corymbia variegata* | Richmond Range | leaf/shoot |
| Q304b | Beaudesert | *Corymbia variegata* | Richmond Range | leaf/shoot |
| Q426D | Beaudesert | *Corymbia variegata* | Richmond Range | leaf/shoot |
| Q435 | Beaudesert | *Corymbia variegata* | Richmond Range | leaf/shoot |
