# Supplementary figures and images for: Epidemic spread of smut fungi (Quambalaria) by sexual reproduction in a native pathosystem
Source: Springer Nature journal article supplement (doi:10.1007/s10658-022-02480-3), 2022-02-19

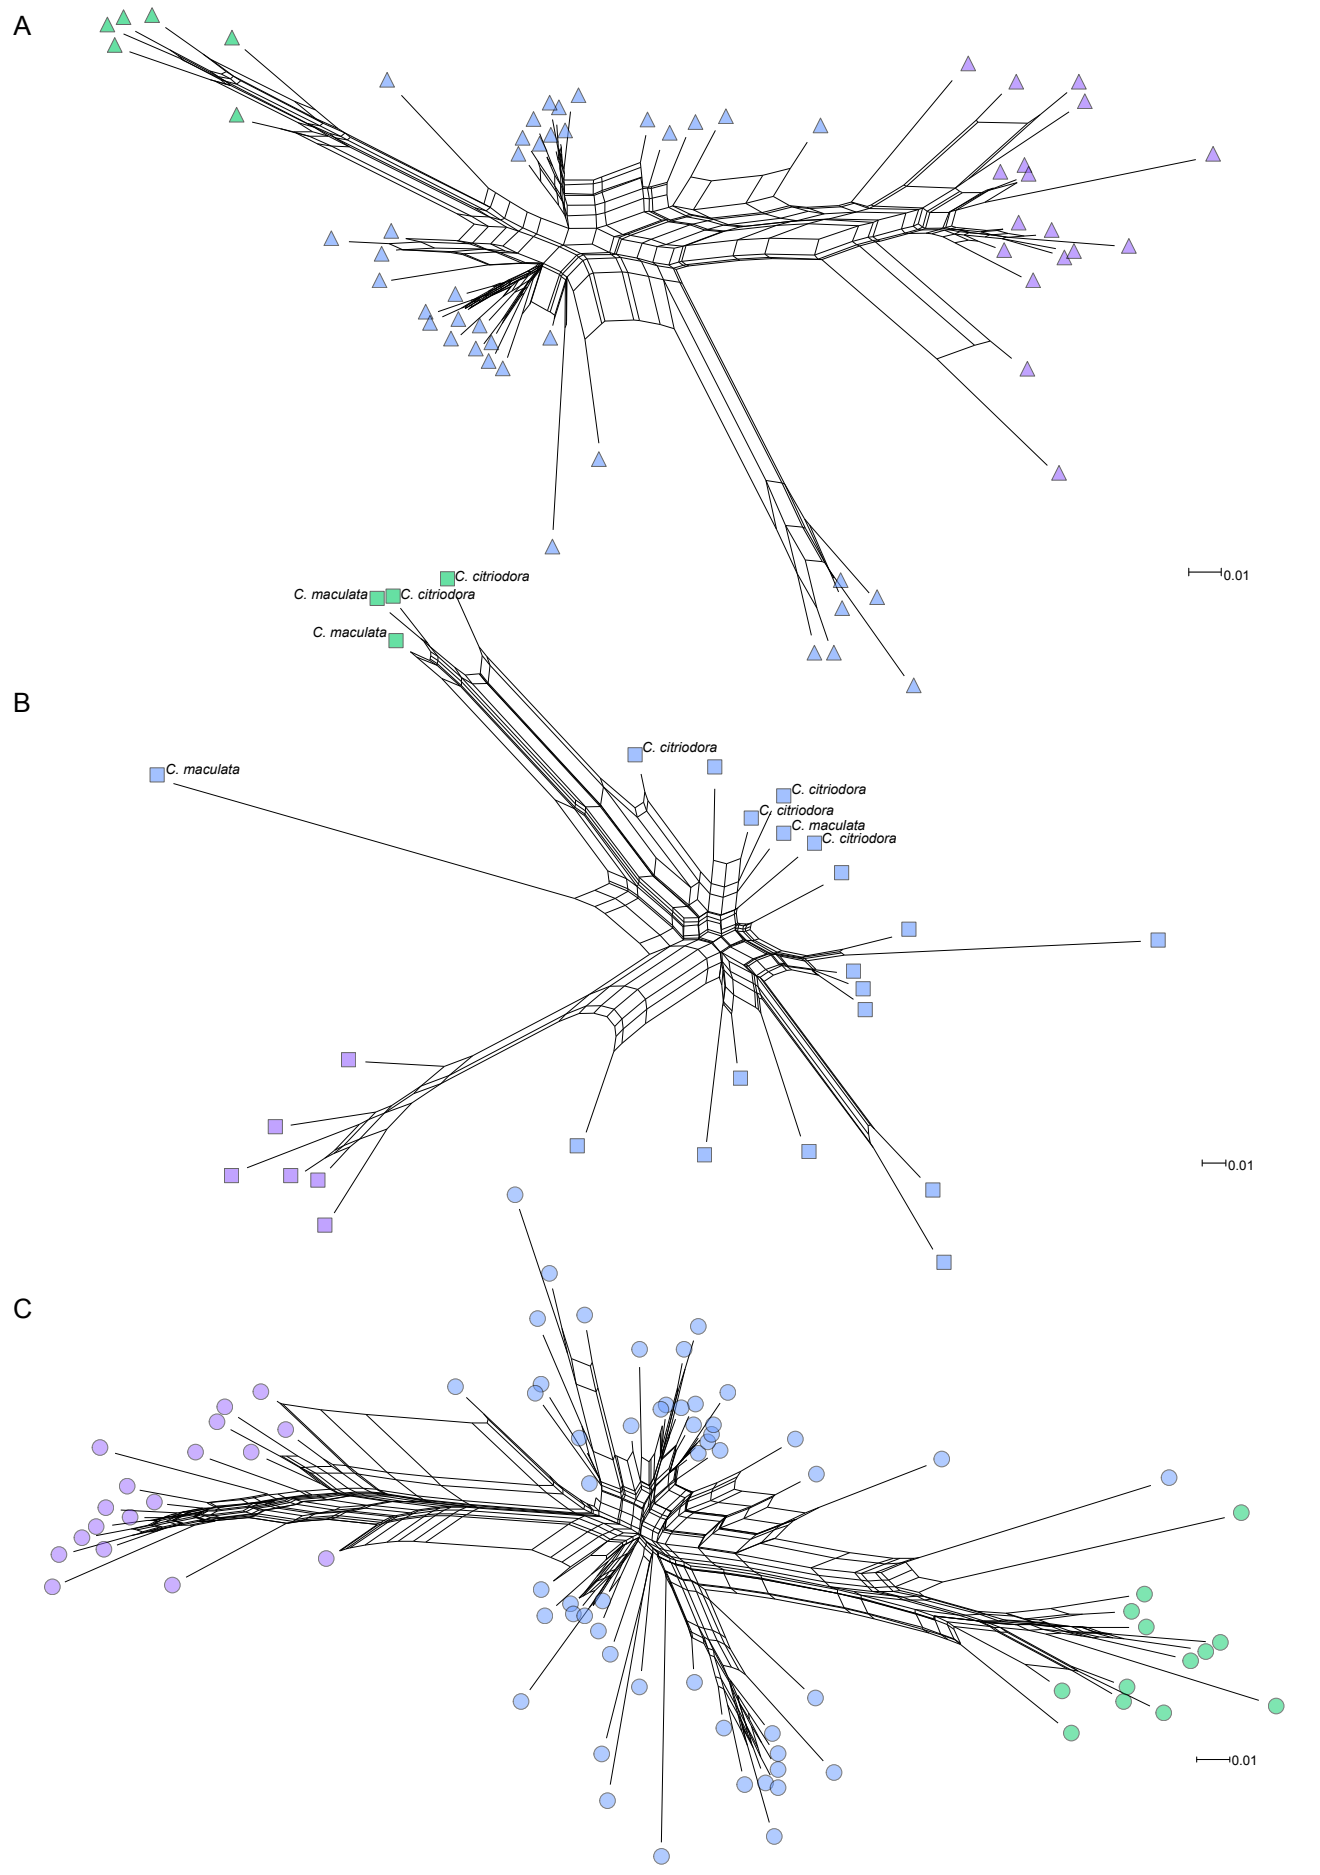

Supplement: MOESM2 [file 10658_2022_2480_MOESM2_ESM.pdf]
